# Supplementary material for: Distinct HIV-1 entry phenotypes are associated with transmission, subtype specificity, and resistance to broadly neutralizing antibodies
Source: PubMed Central journal article supplement (PMC4230403; doi:10.1186/1742-4690-11-48), 2014-06-23

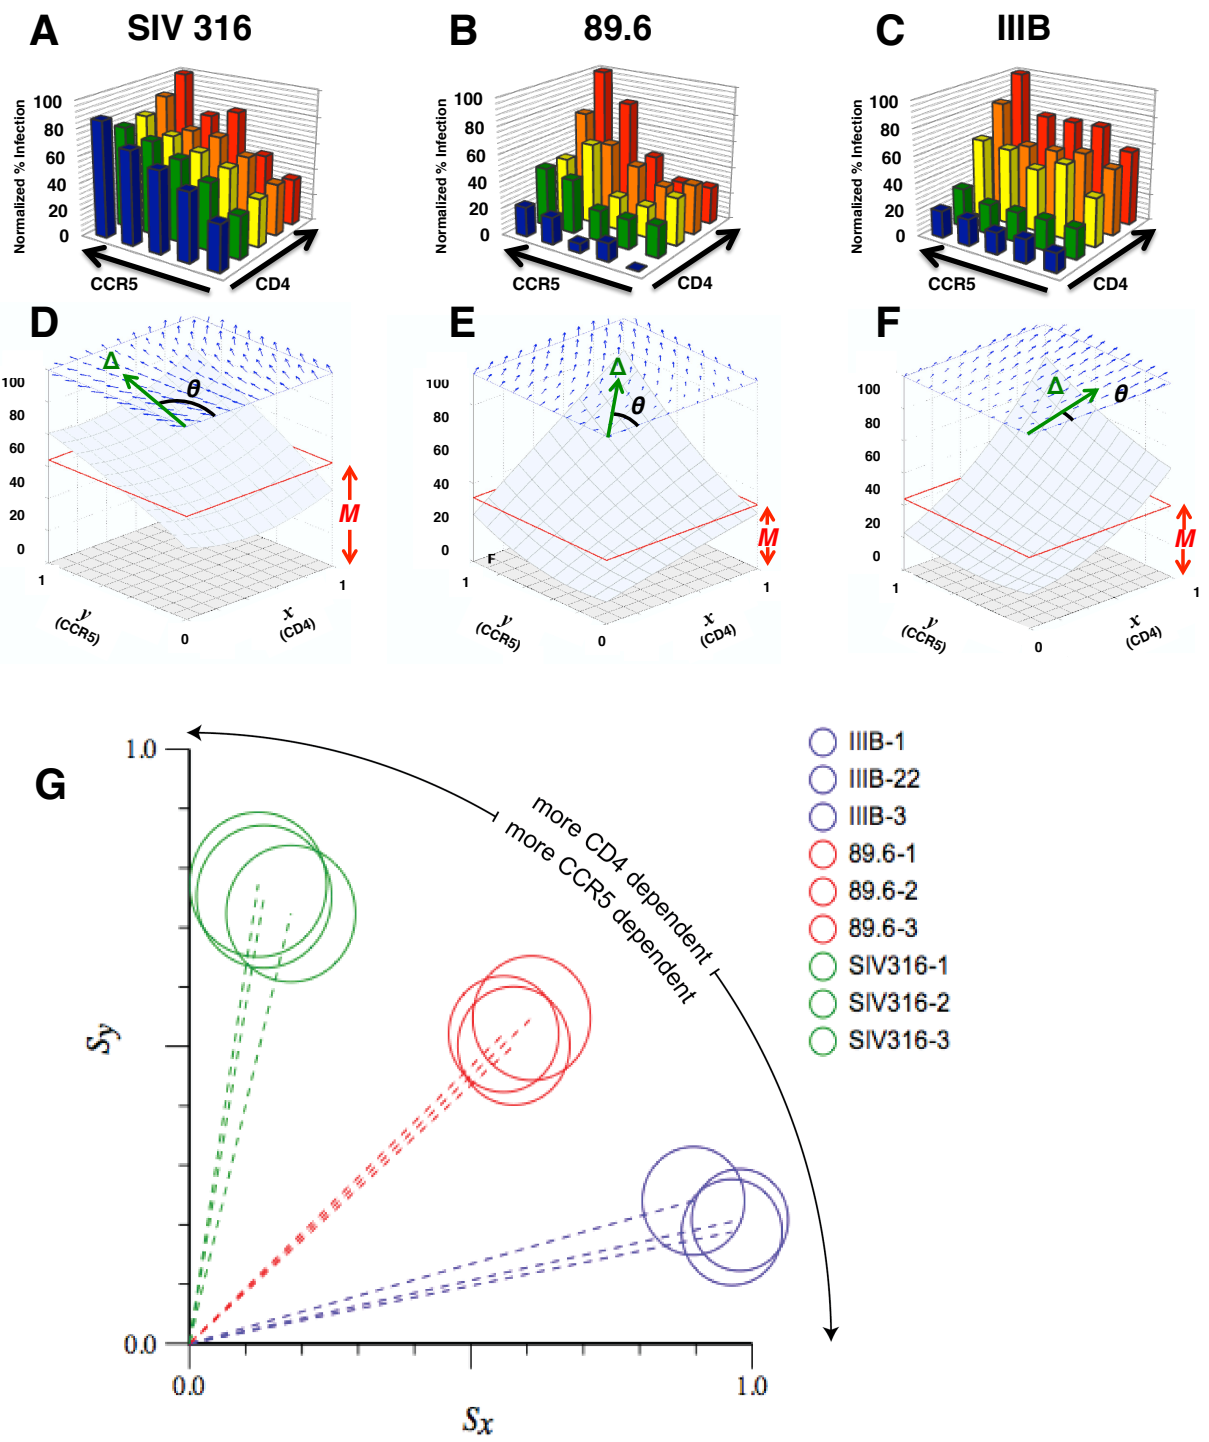

Supplement: 1742-4690-11-48-S1.pdf [file 1742-4690-11-48-S1.pdf]
